# Supplementary material
Source: Research Square preprint supplement (doi:10.21203/rs.3.rs-9269179/v1)
Supplement: Supplementary file 1 [file 546686804fa9ed48bc7c78b3.pdf]

Supplementary Information

# **Impact of Sub-Picosecond Timing Errors on Complex Conductivity Extraction in Terahertz Time-Domain Spectroscopy of Ultrathin FAPbI<sub>3</sub> Films**

Minhee Cha<sup>1†</sup>, Junho Ryeom<sup>2†</sup>, Bong Joo Kang<sup>3</sup>, Hajung Park<sup>1</sup>, Hyunbin Jang<sup>1</sup>, Sung Ju Hong<sup>4</sup>  
and Young-Mi Bahk<sup>1\*</sup>

<sup>1</sup>*Department of Physics, Incheon National University, Incheon 22012, Republic of Korea*

<sup>2</sup>*School of Electrical and Electronics Engineering, Chung-Ang University, Seoul 06974, Republic of Korea*

<sup>3</sup>*Division of photoenergy research center, Korea Research Institute of Chemical Technology (KRICT), Daejeon 34114, Republic of Korea*

<sup>4</sup>*Division of Science Education, Kangwon National University, Chuncheon 24341, Republic of Korea*

*†These authors contributed equally.*

*\* ymb@inu.ac.kr*

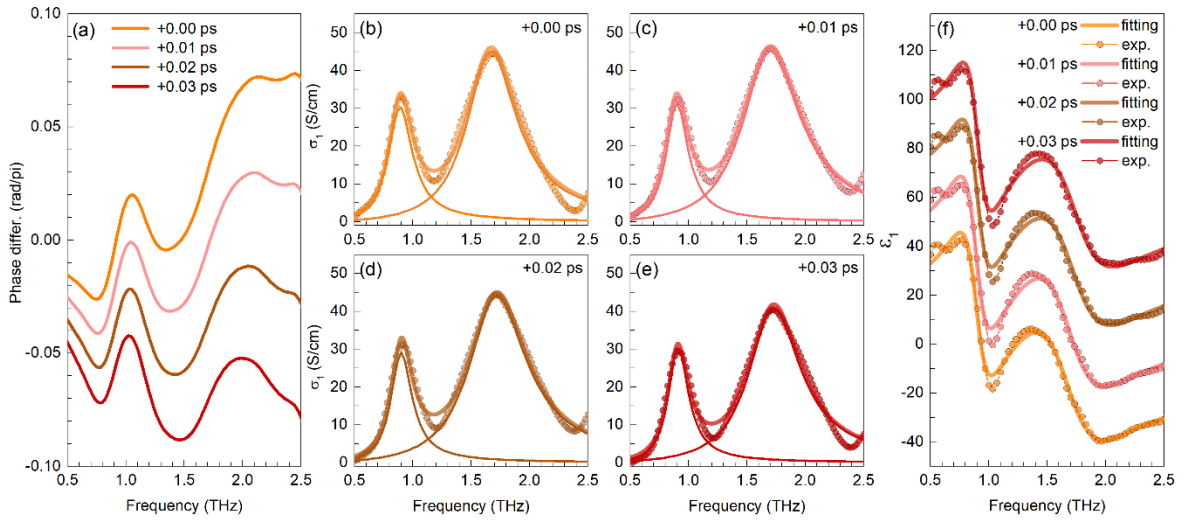

**Figure S1. Lorentz oscillator model fitting of the extracted optical properties.** (a) Phase difference spectra showing the effect of temporal shifts on the transmission phase. (b-e) Extracted real part of the complex conductivity (dotted lines) and the corresponding Lorentz oscillator model fits (solid lines) for Sample 1 before and after timing-error correction (+0.00 ps (b), +0.01 ps (c), +0.02 ps (d), +0.03 ps (e)) (dotted lines) (f) Extracted real part of the dielectric constant (dotted lines) and the corresponding Lorentz oscillator model fits (solid lines) before and after the timing-error correction.

|                              |       | $\omega_0$ (THz) | $\omega_p$ (THz) | $\gamma$ (THz) | $\epsilon_{DC}$ | $\epsilon_\infty$ |
|------------------------------|-------|------------------|------------------|----------------|-----------------|-------------------|
| <b>Sample 1<br/>+0.00 ps</b> | $j=1$ | 0.89             | 0.37             | 0.25           | -13.4           | -13.7             |
|                              | $j=2$ | 1.67             | 0.65             | 0.52           |                 |                   |
| <b>Sample 1<br/>+0.01 ps</b> | $j=1$ | 0.9              | 0.36             | 0.23           | 8.6             | 8.3               |
|                              | $j=2$ | 1.7              | 0.7              | 0.6            |                 |                   |
| <b>Sample 1<br/>+0.02 ps</b> | $j=1$ | 0.9              | 0.34             | 0.22           | 32.8            | 32.5              |
|                              | $j=2$ | 1.72             | 0.69             | 0.6            |                 |                   |
| <b>Sample 1<br/>+0.03 ps</b> | $j=1$ | 0.91             | 0.34             | 0.21           | 56.4            | 56.1              |
|                              | $j=2$ | 1.73             | 0.63             | 0.54           |                 |                   |

**Table S1. Lorentz harmonic oscillator parameters extracted from THz transmission spectra.** Resonance frequency ( $\omega_0$ ), oscillator strength ( $\omega_p$ ), damping constant ( $\gamma$ ), DC dielectric constant ( $\epsilon_{DC}$ ) and high-frequency dielectric constant ( $\epsilon_\infty$ ) obtained from fitting the real part of the complex conductivity and dielectric constant spectra of Sample 1 before and after timing corrections (+0.00 ps, +0.01 ps, +0.02 ps, +0.03 ps).
